# Supplementary material for: Outbreak of Oropouche virus in frontier regions in western Amazon
Source: PubMed Central journal article supplement (PMC10913433; doi:10.1128/spectrum.01629-23), 2024-02-07
Supplement: spectrum.01629-23-s0001.pdf [file spectrum.01629-23-s0001.pdf]

Table S1. *Oropouche orhobunyavirus* S and M segment strains used in this study.

| Sequence ID | Country                 | Collection_date | Segment | GenBank  |
|-------------|-------------------------|-----------------|---------|----------|
| Sample_A01  | Brazil: Humaita, AM     | 16-Nov-2022     | S       | OR500484 |
| Sample_A03  | Brazil: Porto Velho, RO | 02-Feb-2023     | S       | OR500485 |
| Sample_A04  | Brazil: Porto Velho, RO | 16-Feb-2023     | S       | OR500486 |
| Sample_A05  | Brazil: Porto Velho, RO | 14-Feb-2023     | S       | OR500487 |
| Sample_A06  | Brazil: Porto Velho, RO | 06-Feb-2023     | S       | OR500488 |
| Sample_A07  | Brazil: Humaita, AM     | 01-Feb-2022     | S       | OR500489 |
| Sample_A08  | Brazil: Porto Velho, RO | 02-Feb-2023     | S       | OR500490 |
| Sample_A09  | Brazil: Humaita, AM     | 25-Jan-2022     | S       | OR500491 |
| Sample_A11  | Brazil: Porto Velho, RO | 08-Mar-2023     | S       | OR500492 |
| Sample_B05  | Brazil: Humaita, AM     | 16-Nov-2022     | S       | OR500493 |
| Sample_B11  | Brazil: Humaita, AM     | 16-Nov-2022     | S       | OR500494 |
| Sample_B12  | Brazil: Humaita, AM     | 16-Nov-2022     | S       | OR500495 |
| Sample_C05  | Brazil: Porto Velho, RO | 09-Mar-2023     | S       | OR500496 |
| Sample_A01  | Brazil: Humaita, AM     | 16-Nov-2022     | M       | OR500497 |
| Sample_A03  | Brazil: Porto Velho, RO | 02-Feb-2023     | M       | OR500498 |
| Sample_A04  | Brazil: Porto Velho, RO | 16-Feb-2023     | M       | OR500499 |
| Sample_A05  | Brazil: Porto Velho, RO | 14-Feb-2023     | M       | OR500500 |
| Sample_A06  | Brazil: Porto Velho, RO | 06-Feb-2023     | M       | OR500501 |
| Sample_A07  | Brazil: Humaita, AM     | 01-Feb-2022     | M       | OR500502 |
| Sample_A08  | Brazil: Porto Velho, RO | 02-Feb-2023     | M       | OR500503 |
| Sample_A09  | Brazil: Humaita, AM     | 25-Jan-2022     | M       | OR500504 |
| Sample_A11  | Brazil: Porto Velho, RO | 08-Mar-2023     | M       | OR500505 |
| Sample_B05  | Brazil: Humaita, AM     | 16-Nov-2022     | M       | OR500506 |
| Sample_B11  | Brazil: Humaita, AM     | 16-Nov-2022     | M       | OR500507 |
| Sample_B12  | Brazil: Humaita, AM     | 16-Nov-2022     | M       | OR500508 |
| Sample_C05  | Brazil: Porto Velho, RO | 09-Mar-2023     | M       | OR500509 |
